# Supplementary material for: Biology-driven therapy advances in high-grade serous ovarian cancer
Source: PubMed Central journal article supplement (PMC10760962; doi:10.1172/jci174013), 2024-01-02
Supplement: jci-134-174013-s091.pdf [file jci-134-174013-s091.pdf]

## Supplemental Material:

**Supplemental Table S1: Ovarian cancer cell lines**

| Name      | Original annotation  | Histology | TP53 status         | Other mutations       |
|-----------|----------------------|-----------|---------------------|-----------------------|
| CAOV3     | ovary_adenocarcinoma | HGSOC     | Truncating Mutation |                       |
| CAOV4     | ovary_adenocarcinoma | HGSOC     | Missense Mutation   | Myc                   |
| COV318    | ovary_adenocarcinoma | HGSOC     | Missense Mutation   | CCNE1                 |
| COV362    | ovary_adenocarcinoma | HGSOC     | Missense Mutation   | BRCA1, RB1, Myc       |
| FUOV1     | ovary_adenocarcinoma | HGSOC     | Missense Mutation   | Myc, CCNE1            |
| JHOS2     | ovary_adenocarcinoma | HGSOC     | Truncating Mutation | BRCA1                 |
| JHOS4     | ovary_adenocarcinoma | HGSOC     | Missense Mutation   |                       |
| KURAMOCHI | ovary_adenocarcinoma | HGSOC     | Missense Mutation   | BRCA2, Myc, KRAS      |
| NIHOVCAR3 | ovary_adenocarcinoma | HGSOC     | Missense Mutation   | CCNE1, RB1            |
| OAW28     | ovary_adenocarcinoma | HGSOC     | Truncating Mutation | KRAS                  |
| ONCODG1   | ovary_adenocarcinoma | HGSOC     | Missense Mutation   | KRAS, CCNE1, C11orf30 |
| OVCAR4    | ovary_adenocarcinoma | HGSOC     | Missense Mutation   |                       |
| OVKATE    | ovary_adenocarcinoma | HGSOC     | Missense Mutation   |                       |
| OVSAHO    | ovary_adenocarcinoma | HGSOC     | Truncating Mutation | BRCA2, RB1            |
| SNU119    | ovary_adenocarcinoma | HGSOC     | Truncating Mutation | Myc                   |
| SNU8      | ovary_adenocarcinoma | HGSOC     | Truncating Mutation | CCNE1, KRAS           |
| TYKNU     | ovary_adenocarcinoma | HGSOC     | Missense Mutation   |                       |
| 59M       | ovary_adenocarcinoma | HGSOC     | Truncating Mutation | Myc                   |
| COV504    | ovary_adenocarcinoma | HGSOC     | Mutation            |                       |
| OV90      | ovary_adenocarcinoma | HGSOC     | Missense Mutation   | BRAF                  |
| OVCAR5    | ovary_adenocarcinoma | HGSOC     | Wild Type           | KRAS                  |
| OVCAR8    | ovary_adenocarcinoma | HGSOC     | Truncating Mutation | ERBB2, KRAS, CTNNB1   |
| OV56      | ovary_adenocarcinoma | HGSOC     | Truncating Mutation | PTEN, KRAS, ARID1A    |

|         |                       |            |                          |                                   |
|---------|-----------------------|------------|--------------------------|-----------------------------------|
| RMUGS   | ovary_adenocarcinoma  | MOC        | Missense Mutation        |                                   |
| JHOM1   | ovary_adenocarcinoma  | MOC        | Truncating Mutation      | C11orf30, RB1, PIK3CA             |
| COV644  | ovary_adenocarcinoma  | MOC        | Truncating Mutation      |                                   |
| EFO21   | ovary_adenocarcinoma  | OCCC       | Truncating Mutation      |                                   |
| JHOC5   | ovary_adenocarcinoma  | OCCC       | Wild Type                |                                   |
| COLO704 | Endometrial_carcinoma | EOC        | Wild Type                | RB1,PTEN,                         |
| OVISE   | ovary_adenocarcinoma  | OCCC       | Wild Type                | ARID1A                            |
| OAW42   | ovary_carcinoma       | HGSOC      | Wild Type                | PTEN,ARID1A                       |
| OVTOKO  | ovary_adenocarcinoma  | OCCC       | Wild Type                | ARID1A                            |
| OVMANA  | ovary_adenocarcinoma  | OCCC       | Wild Type                | BRCA2, PIK3CA, ARID1A             |
| RMGI    | ovary_adenocarcinoma  | OCCC       | Homozygous deletion      |                                   |
| HEYA8   | ovary_adenocarcinoma  | LGSOC      | Wild Type                | KRAS, BRAF                        |
| MCAS    | ovary_adenocarcinoma  | MOC        | Wild Type                | PTEN, KRAS                        |
| COV434  | ovary_adenocarcinoma  | EOC        | Wild Type                | ARID1A                            |
| SKOV3   | ovary_adenocarcinoma  | MOC        | Truncating Mutation      | PTEN,ERBB2, ARID1A                |
| A2780   | ovary_adenocarcinoma  | EOC        | Wild Type                | PTEN, Myc, BRAF, ARID1A           |
| EFO27   | ovary_adenocarcinoma  | EOC        | Truncating Mutation      |                                   |
| OVK18   | ovary_adenocarcinoma  | EOC        | Truncating Mutation      | PTEN, KRAS, ARID1A                |
| IGROV1  | ovary_adenocarcinoma  | EOC & OCCC | Null                     | PTEN, BRCA1, BRCA2, Myc,ARID1A    |
| JHOC5   | ovary_adenocarcinoma  | OCCC       | Wild Type                | BRCA1, BRCA2, Myc, PIK3CA,ARID1A  |
| OC316   | ovary_adenocarcinoma  | MOC        | Null                     | BRCA2, PIK3CA, ARID1A             |
| OC314   | ovary_adenocarcinoma  | OCCC       | Missense Mutation        | Myc, BRAF, ARID1A                 |
| TOV21G  | ovary_adenocarcinoma  | OCCC       | Wild Type                | PTEN,CTNNB1, PIK3CA, ARID1A       |
| TOV112D | ovary_adenocarcinoma  | EOC        | Missense Mutation        | Myc, PIK3CA, KRAS, CTNNB1, ARID1A |
| JHOM2B  | ovary_adenocarcinoma  | MOC        | Homozygous deletion/Null | BRCA1, Myc, BRAF                  |
| ES2     | ovary_adenocarcinoma  | OCCC       | Truncating Mutation      | BRAF,                             |

|                                                                                                                                                                                                                                       |                      |               |                   |                                     |
|---------------------------------------------------------------------------------------------------------------------------------------------------------------------------------------------------------------------------------------|----------------------|---------------|-------------------|-------------------------------------|
| OV7                                                                                                                                                                                                                                   | ovary_adenocarcinoma | SOC & OCCC    | Missense Mutation | KRAS, RB1                           |
| NZOV9                                                                                                                                                                                                                                 | ovary_adenocarcinoma | EOC           | Wild Type         | ARID1A, BRCA2, CTNNB1, PIK3CA, PTEN |
| OC315                                                                                                                                                                                                                                 | ovary_adenocarcinoma | SOC           | Not clear         | Not clear                           |
| OCIP5X                                                                                                                                                                                                                                | ovary_adenocarcinoma | SOC           | Mutation/ Null    | BRAF                                |
| SNU840                                                                                                                                                                                                                                | brenner_tumor        | Brenner Tumor | Wild Type         | PIK3CA                              |
| DOV13                                                                                                                                                                                                                                 | ovary_adenocarcinoma | SOC           | Mutation/ Null    |                                     |
| OCIC4P                                                                                                                                                                                                                                | ovary_adenocarcinoma | OCCC          | Mutation/ Null    | MSH6, BARD1, CCND1, INPPL1, ERBB3   |
| <p>OCCC: Ovarian clear-cell carcinoma<br/> EC: Endometrioid carcinomas<br/> HGSOC: High grade serous ovarian cancer<br/> LGSOC: Low grade serous ovarian cancer<br/> SOC: Serous ovarian cancer<br/> MOC: Mucinous ovarian cancer</p> |                      |               |                   |                                     |

### Supplemental Table S2. Murine cell lines

| Murine established cell line |        |           |
|------------------------------|--------|-----------|
| Name                         | Origin | Histology |
| ID8                          | MOSE   | Serous    |
| IG10                         | MOSE   | Serous    |
| IF5                          | MOSE   | Serous    |
| NuTu-19                      | MOSE   | Serous    |
| BPPNM (HR-deficient)         | FTE    | HGSOC     |
| PPNM (non-classified)        | FTE    | HGSOC     |
| BPCA (HR-proficient)         | FTE    | HGSOC     |
| SPCA (HR-proficient)         | FTE    | HGSOC     |
| KPCA (HR-proficient)         | FTE    | HGSOC     |
